# Supplementary material for: Interactions among vascular plants, bryophytes, and lichens in grassland communities along elevational gradients
Source: Naturwissenschaften. 2025 Dec 2;113(1):2. doi: 10.1007/s00114-025-02049-0 (PMC12672851; doi:10.1007/s00114-025-02049-0)
Supplement: Supplementary file 1 — Supplementary Material 1 (XLSX. 16.8 KB) [file 114_2025_2049_MOESM1_ESM.xlsx]

## Sheet: Foglio1
Pania della Croce
Vascular plants1	Bryophytes2	Lichens3		1. Species nomenclature is based on Portal to the Flora of Italy. Available at http:/dryades.units.it/floritaly [Accessed: 17/10/2025]
Achillea millefolium	Brachytheciastrum velutinum	Agonimia tristicula		2. Species nomenclature is based on Hill, M. O., Bell, N., Bruggeman-Nannenga, M. A., Brugués, M., Cano, M. J., Enroth, J., … Söderström, L. (2006). An annotated checklist of the mosses of Europe and Macaronesia. Journal of Bryology, 28(3), 198–267. https://doi.org/10.1179/174328206X119998
Alchemilla xanthochlora	Brachythecium rutabulum	Bilimbia hypnorum		3. Species nomenclature is based on Nimis P.L., 2025. ITALIC - The Information System on Italian Lichens. Version 8.0. University of Trieste, Dept. of Biology, (https://dryades.units.it/italic), accessed on 2025, 10, 17. for all. All data are released under a CC BY-SA 4.0 licence.
Allium sp.	Bryum alpinum	Cladonia pyxidiata
Anthoxanthum odoratum	Bryum argenteum	Cladonia symphycarpa
Anthyllis sp.	Bryum caespiticium	Enchylium tenax
Anthyllis montana	Bryum capillare	Scytinium lichenoides
Anthyllis vulneraria	Bryum pallens	Scytinium schrareri
Aposeris foetida	Bryum elegans
Aquilegia bertolonii	Bryum torquescens
Arabis collina	Campyliadelphus chrysophyllus
Arenaria leptoclados	Ceratodon purpureus
Asperula apuana	Ctenidium molluscum
Asperula aristata	Distichium capillaceum
Astragalus monspessulanus	Ditrichum flexicaule
Bellidiastrum michelii	Ditrichum gracile
Biscutella apuana	Encalypta streptocarpa
Botrychium lunaria	Eurynchium scheilecheri
Brachypodium rupestre	Fissidens dubius
Briza media	Fissidens taxifolius
Bromopsis erecta	Homlothecium lutescens
Campanula glomerata	Hypnum cupressiforme
Campanula rotundifolia	Isopterygiopsis pulchella
Carduus defloratus	Mesoptichia collaris
Carex caryophyllea	Orhothecium rufescens
Carex digitata	Oxyrrinchium hians
Carex humilis	Pohlia cruda
Carex macrolepis	Pohlia nutans
Carex macrostachys	Preissia quadrata
Carex mucronata	Rhyncostegium murale
Carex sempervirens	Saelania glaucescens
Carex sp.	Syntrichia ruralis
Carlina acaulis	Tortella tortuosa
Carlina sp.	Trychostomum brachydontium
Carum appuanum	Weissia condensa
Centaurea triumfettii	Weissia controversa
Cerastium arvense
Cirsium eriophorum
Coronilla minima
Coronilla vaginalis
Crepis alpestris
Crepis leontodontoides
Crocus sp.
Cruciata glabra
Dactylis glomerata
Dactylorhiza maculata
Daphne alpina
Dianthus seguieri
Dianthus sp.
Erica carnea
Erysimum pseudorhaeticum
Euphorbia amygdaloides
Euphorbia cyparissias
Festuca alfrediana
Festuca circummediterranea
Festuca ferrariniana
Festuca inops
Festuca laevigata
Festuca rubra
Festuca sp.
Festuca violacea
Fraxinus ornus
Galium anisophyllon
Galium corrudifolium
Genista tinctoria
Gentiana acaulis
Gentiana utriculosa
Gentiana verna
Gymnadenia conopsea
Helianthemum oelandicum
Helichrysum italicum
Helictochloa praetutiana
Helleborus viridis
Hepatica nobilis
Hieracium sp.
Hippocrepis comosa
Hypericum coris
Hypericum perforatum
Hypericum richeri
Iberis sempervirens
Juniperus communis
Knautia collina
Lathyrus pratensis
Lathyrus sylvestris
Leucanthemum heterophyllum
Lilium sp.
Linum catharticum
Lotus corniculatus
Luzula multiflora
Luzula pedemontana
Ononis spinosa
Orchis sp.
Petrosedum rupestre
Phyteuma hemisphaericum
Phyteuma italicum
Phyteuma orbiculare
Pilosella officinarum
Pilosella piloselloides
Pimpinella saxifraga
Pimpinella tragium
Plantago argentea
Poa alpina
Polygala alpestris
Polygala chamaebuxus
Potentilla crantzii
Potentilla erecta
Potentilla micrantha
Poterium sanguisorba
Primula veris
Pteridium aquilinum
Ranunculus pollinensis
Robertia taraxacoides
Rosa sp.
Santolina pinnata
Saxifraga paniculata
Scabiosa sp.
Sedum sexangulare
Sesleria apennina
Sesleria argentea
Silene pichiana
Soldanella alpina
Sorbus aria
Stachys arvensis
Stachys recta
Hieracium sp.
Teucrium chamaedrys
Teucrium montanum
Thesium sommieri
Thymus praecox
Thymus pulegioides
Tragopogon sp.
Trifolium medium
Trifolium sp.
Trinia dalechampii
Vaccinium myrtillus
Valeriana montana
Veronica officinalis
Vicia sepium
Vincetoxicum hirundinaria
Viola alba
Viola riviniana
Viola sp.
Ziziphora granatensis
Monte Prado
Vascular plants1	Bryophytes2	Lichens3
Achillea millefolium	Bartramia ithyphylla	Catapyrenium cinereum
Agrostis capillaris	Brachytheciastrum velutinum	Cetraria islandica
Ajuga reptans	Brachythecium albicans	Cladonia furcata
Alchemilla transiens	Brachythecium rutabulum	Cladonia gr. chlorophea
Alchemilla xanthochlora	Bryum caespiticium	Cladonia gr. coccifera
Anemonoides nemorosa	Cephaloziella divaricata	Cladonia mitis
Anthoxanthum nipponicum	Ceratodon purpureus	Cladonia pyxidiata
Anthoxanthum odoratum	Eurynchium pulchellum	Cladonia sp.
Anthoxanthum sp.	Fissidens taxifolius
Arenaria serpyllifolia	Heterocladium dimorphum
Asperula aristata	Hypnum cupressiforme
Asphodelus macrocarpus	Pohlia cruda
Astragalus hypoglottis	Pohlia nutans
Atocion rupestre	Polytrichum juniperinum
Avenella flexuosa	Polytrichum piliferum
Biscutella laevigata	Porella cordeana
Bistorta officinalis	Racomitrium canescens
Brachypodium genuense	Tortella tortuosa
Briza media	Weissia codensa
Bromopsis erecta
Bupleurum falcatum
Calluna vulgaris
Campanula glomerata
Campanula scheuchzeri
Carex caryophyllea
Carex macrolepis
Carex sempervirens
Carex sp.
Carlina acaulis
Centaurea nervosa
Centaurea triumfettii
Cerastium arvense
Clinopodium alpinum
Crocus neglectus
Cruciata glabra
Cryptogramma crispa
Cytisus scoparius
Dactylis glomerata
Dianthus deltoides
Dianthus hyssopifolius
Dianthus sylvestris
Digitalis lutea
Ervilia hirsuta
Erysimum pseudorhaeticum
Euphorbia cyparissias
Euphorbia dulcis
Festuca circummediterranea
Festuca filiformis
Festuca riccerii
Festuca rubra
Festuca sp.
Galium album
Galium anisophyllon
Galium corrudifolium
Galium obliquum
Genista tinctoria
Geum montanum
Helianthemum nummularium
Hieracium sp.
Hippocrepis comosa
Hypericum montanum
Hypericum perforatum
Hypericum richeri
Juniperus communis
Knautia arvensis
Knautia collina
Laburnum anagyroides
Lamium maculatum
Lathyrus linifolius
Lathyrus pratensis
Lathyrus vernus
Leontodon crispus
Leontodon hispidus
Leucanthemum heterophyllum
Lilium martagon
Linaria purpurea
Linum usitatissimum
Lotus corniculatus
Luzula campestris
Luzula multiflora
Luzula pedemontana
Meum athamanticum
Microthlaspi perfoliatum
Narcissus poëticus
Narcissus tazetta
Nardus stricta
Oreojuncus trifidus
Orobanche gracilis
Patzkea paniculata
Phleum rhaeticum
Phyteuma hemisphaericum
Phyteuma italicum
Phyteuma orbiculare
Pilosella officinarum
Pimpinella saxifraga
Plantago alpina
Plantago maritima
Poa alpina
Polygala alpestris
Potentilla aurea
Potentilla crantzii
Potentilla erecta
Potentilla micrantha
Potentilla sp.
Poterium sanguisorba
Primula veris
Ranunculus pollinensis
Ranunculus sp.
Rubus idaeus
Rubus sp.
Rumex acetosa
Rumex nebroides
Saxifraga aspera
Scabiosa sp.
Senecio doronicum
Serratula tinctoria
Silene nutans
Silene vulgaris
Solidago virgaurea
Sorbus aria
Stellaria graminea
Thesium alpinum
Thymus praecox
Thymus pulegioides
Trifolium alpinum
Trifolium medium
Trifolium pratense
Trifolium repens
Trisetaria flavescens
Trollius europaeus
Vaccinium myrtillus
Vaccinium uliginosum
Verbascum sp.
Veronica fruticans
Veronica officinalis
Vicia cracca
Vicia incana
Vicia sepium
Viola canina
Viola ferrarinii
